# Supplementary material for: Proteomic analysis reveals a role of melatonin in promoting cucumber seed germination under high salinity by regulating energy production
Source: PubMed Central journal article supplement (PMC5428666; doi:10.1038/s41598-017-00566-1), 2017-03-29
Supplement: 41598_2017_566_MOESM1_ESM.pdf [file 41598_2017_566_MOESM1_ESM.pdf]

**Proteomic analysis reveals a role of melatonin in promoting cucumber seed germination under high salinity by regulating energy production**

Na Zhang<sup>1\*</sup>, Hai-Jun Zhang<sup>1,2\*</sup>, Qian-Qian Sun<sup>1\*</sup>, Yun-Yun Cao<sup>1</sup>, Xing-Sheng Li<sup>3</sup>, Bing Zhao<sup>1</sup>, Ping Wu<sup>2</sup> & Yang-Dong Guo<sup>1</sup>

\*These authors contributed equally to this work

<sup>1</sup>College of Horticulture, China Agricultural University, Beijing, China.

<sup>2</sup>Beijing Vegetable Research Center, Beijing Academy of Agriculture and Forestry Sciences, National Engineering Research Center for Vegetables, Beijing 100097, China.

<sup>3</sup>Shandong Provincial Key Laboratory of Cucurbitaceae Vegetable Biological Breeding, Shandong Huasheng Agriculture Co. Ltd, Shandong, China

Corresponding author: Y.-D. Guo, College of Horticulture, China Agricultural University, No. 2, Yuanmingyuan West Rd, Beijing 100193, P. R. China.

Tel: (86-10)-62734845; Fax: (86-10)-62733404; E-mail: yaguo@cau.edu.cn.

Co-Corresponding author: P. Wu, Beijing Vegetable Research Center, Beijing Academy of Agriculture and Forestry Sciences, No. 50, Zhanghua Rd, Beijing 100097, P. R. China.

Tel: (86-10)-51503077; E-mail: wuping@nercv.org

B. Zhao, College of Horticulture, China Agricultural University, No. 2, Yuanmingyuan West Rd, Beijing 100193, P. R. China.

Tel: (86-10)-62734095; Email: zhaobing@cau.edu.cn

Table. S1 Differentially expressed proteins by melatonin and NaCl stress effects in cucumber seeds.

| Protein ID | Description                                                           | (NaCl+MT)/NaCl |         | NaCl /CK |         |
|------------|-----------------------------------------------------------------------|----------------|---------|----------|---------|
|            |                                                                       | Value          | P       | Value    | P       |
| Q5UFR1     | 14-3-3 protein                                                        | 24.64          | 0.00000 | -        | -       |
| W9S288     | 14-3-3-like protein gf14 iota                                         | 31.92          | 0.00004 | -        | -       |
| Q39558     | 14-3-3-like protein gf14 omega                                        | 0.66           | 0.22418 | -        | -       |
| B9HII6     | 1-cys peroxiredoxin                                                   | 2.17           | 0.00651 | 5.19     | 0.00138 |
| M5W204     | 26s proteasome non-atpase regulatory subunit 4 homolog                | 2.10           | 0.00011 | 8.42     | 0.00427 |
| I1K657     | 26s proteasome regulatory subunit rpn13-like isoform x1               | 3.72           | 0.00531 | -        | -       |
| G7IFI0     | 28 kda heat- and acid-stable phosphoprotein                           | 0.19           | 0.00201 | 0.59     | 0.13080 |
| W9QS28     | 40s ribosomal protein s10-like                                        | 10.59          | 0.00008 | -        | -       |
| A0A067L2F9 | 40s ribosomal protein s12-like isoform x2                             | 6.60           | 0.00005 | -        | -       |
| A9PAL8     | 40s ribosomal protein s20-2                                           | 4.85           | 0.00001 | 4.40     | 0.00023 |
| B9RFA5     | 40s ribosomal protein s21-2                                           | 9.81           | 0.00139 | -        | -       |
| O65731     | 40s ribosomal protein s5                                              | 43.20          | 0.00061 | -        | -       |
| M5WFB9     | 5-methyltetrahydropteroyltriglutamate--homocysteine methyltransferase | 12.42          | 0.00693 | -        | -       |
| Q6UNT2     | 60s ribosomal protein l5                                              | 0.32           | 0.00645 | 0.56     | 0.29084 |
| A0A067KWC5 | 60s ribosomal protein l9                                              | 6.20           | 0.00036 | -        | -       |
| A0A067JQD9 | Actin-7                                                               | 19.51          | 0.00010 | 2.40     | 0.00833 |
| Q0GYN5     | Acyl- -binding protein                                                | 0.14           | 0.00005 | -        | -       |
| W9SCA0     | Acyl- -binding protein                                                | 0.26           | 0.00462 | -        | -       |
| C6TKB1     | Adenylate kinase 4                                                    | 26.42          | 0.00001 | -        | -       |
| W9SB70     | Alpha-xylosidase 1-like                                               | 6.36           | 0.00003 | 7.26     | 0.00008 |
| O04057     | Aspartic proteinase                                                   | 4.09           | 0.00003 | 15.40    | 0.00009 |
| Q5QCG3     | Atp synthase f1 subunit 1                                             | -              | -       | 2.50     | 0.01669 |
| B9T1V8     | Atp synthase subunit mitochondrial-like                               | 11.33          | 0.00001 | 3.76     | 0.00007 |
| A9PCU6     | Calcium-binding ef hand family protein                                | 0.12           | 0.00002 | 0.16     | 0.00000 |
| G7L3N5     | Calmodulin                                                            | 4.20           | 0.00001 | -        | -       |
| B9N6T6     | Calmodulin-7                                                          | 0.20           | 0.00348 | 0.28     | 0.00656 |
| M5WAL0     | Calmodulin-7                                                          | 0.18           | 0.00006 | 0.32     | 0.00492 |
| V7BGM6     | Calmodulin-like protein 11                                            | -              | -       | 2.65     | 0.00050 |
| I1NF03     | Calreticulin                                                          | 0.54           | 0.00368 | 0.49     | 0.03150 |
| M5XFT0     | Cap-gly domain-containing linker protein 1                            | 0.43           | 0.00210 | 0.61     | 0.13236 |
| W9RHE5     | Cap-gly domain-containing linker protein 1                            | 0.29           | 0.00471 | 0.59     | 0.10874 |
| B9SFS0     | Carboxymethylenebutenolidase homolog                                  | 5.07           | 0.00028 | 4.41     | 0.00323 |
| B9T0Z2     | Carrier protein mitochondrial                                         | 37.22          | 0.00003 | -        | -       |
| M5VVX1     | Cd2 antigen cytoplasmic tail-binding protein 2 isoform x1             | 0.49           | 0.01656 | -        | -       |
| G7K984     | Corticosteroid 11-beta-dehydrogenase                                  | 6.95           | 0.00029 | -        | -       |
| Q96403     | Cucumber peeling cupredoxin-like                                      | 0.45           | 0.00022 | -        | -       |
| B9GHC4     | Cysteine proteinase rd21a-like                                        | -              | -       | 1.51     | 0.21080 |
| E5GBR6     | Cysteine synthase                                                     | 7.60           | 0.00009 | -        | -       |
| G7KAG6     | Cytochrome c oxidase subunit 6b-1-like                                | 0.53           | 0.00599 | -        | -       |
| B9HY30     | Cytosolic phosphoglycerate kinase family protein                      | 10.79          | 0.02090 | 19.00    | 0.05771 |

|            |                                                           |       |         |       |         |
|------------|-----------------------------------------------------------|-------|---------|-------|---------|
| G7JB35     | Dead-box atp-dependent rna helicase 56                    | -     | -       | 2.54  | 0.02692 |
| K7MB89     | Desiccation-related protein pcc13-62                      | 3.32  | 0.00759 | -     | -       |
| I1J4C8     | Duf3456 domain protein                                    | 0.37  | 0.00851 | -     | -       |
| P13744     | Edestin 2                                                 | 19.40 | 0.00001 | 21.82 | 0.00001 |
| V5IV18     | Elongation factor 1-alpha                                 | 9.25  | 0.00049 | 4.08  | 0.00098 |
| U5FMF5     | Embryonic protein dc-8                                    | 0.32  | 0.00211 | -     | -       |
| I1MC31     | Endoplasmin homolog isoform x1                            | 0.49  | 0.00683 | -     | -       |
| A0A067JHW3 | Enolase                                                   | 6.84  | 0.00003 | 9.15  | 0.00003 |
| M5WBU5     | Eukaryotic translation initiation factor 3 subunit j-like | 0.17  | 0.00059 | 0.47  | 0.03185 |
| V7AU18     | Far upstream element-binding protein 1-like               | 0.20  | 0.00018 | 0.25  | 0.00470 |
| M5XJW9     | Far upstream element-binding protein 2                    | 0.15  | 0.00068 | 0.16  | 0.02009 |
| W9QFK5     | Fasciclin-like arabinogalactan protein 1                  | 0.44  | 0.00098 | 0.46  | 0.00014 |
| U5G711     | Fasciclin-like arabinogalactan protein 17                 | 11.16 | 0.00000 | 1.58  | 0.00689 |
| M5WXE6     | Fasciclin-like arabinogalactan protein 7                  | 2.36  | 0.00964 | -     | -       |
| A0A067KAC0 | Fasciclin-like arabinogalactan protein 8                  | 0.40  | 0.00079 | -     | -       |
| A0A067KLE6 | Fructose-1 family protein                                 | 2.33  | 0.00046 | 3.20  | 0.00034 |
| I1LZG1     | Fructose-bisphosphate cytoplasmic isozyme-like            | 2.38  | 0.01167 | 6.15  | 0.00003 |
| W9RG25     | Glucan endo- -beta-glucosidase 4                          | 0.19  | 0.00031 | 0.29  | 0.04885 |
| C6TG21     | Glucan endo- -beta-glucosidase-like protein               | 0.47  | 0.00819 | 0.61  | 0.00022 |
| A0A067JL19 | Glucose and ribitol dehydrogenase homolog 1               | 13.81 | 0.00002 | 13.81 | 0.00002 |
| U3RGD2     | Glutaredoxin-like protein                                 | 0.48  | 0.00718 | -     | -       |
| I3SE57     | Glutathione s-transferase dhar2                           | -     | -       | 2.17  | 0.07598 |
| E1B2J6     | Glyceraldehyde-3-phosphate dehydrogenase                  | 8.37  | 0.00003 | -     | -       |
| B9H3B0     | Glycosyl hydrolase family 17 family protein               | 2.19  | 0.01513 | 0.30  | 0.02392 |
| B7SHL2     | Gly-rich rna-binding protein                              | -     | -       | 2.31  | 0.01158 |
| I3T6C4     | Grf1-interacting factor 3-like                            | 0.20  | 0.00133 | 0.32  | 0.07447 |
| A0A067L6A9 | Grpe protein mitochondrial                                | 0.27  | 0.02822 | -     | -       |
| B9HJ80     | H+-transporting two-sector atpase family protein          | -     | -       | 4.51  | 0.00427 |
| A0A067KUJ3 | Heat shock 70 kda mitochondrial                           | 3.06  | 0.00016 | -     | -       |
| G7L007     | Heat shock 70 kda protein                                 | 10.95 | 0.00003 | -     | -       |
| M5W6U5     | Heat shock 70 kda protein                                 | 2.22  | 0.00015 | 3.24  | 0.00004 |
| B9HDE5     | Heat shock 70 kda protein 17-like                         | 2.72  | 0.00006 | -     | -       |
| W9RXY8     | Heat shock cognate protein 80                             | 3.86  | 0.00007 | -     | -       |
| Q9M4E7     | Heat shock protein 70                                     | 11.16 | 0.00619 | 10.99 | 0.03789 |
| B9GVM4     | Heat shock protein 70 cognate                             | -     | -       | 2.15  | 0.00333 |
| A0A067JRU1 | Heat shock protein 83                                     | 5.01  | 0.00009 | 1.63  | 0.11292 |
| A0A067JMD9 | Histone acetyltransferase                                 | 8.36  | 0.00008 | -     | -       |
| K7KM74     | Histone chaperone domain chz protein                      | 0.56  | 0.00609 | 0.46  | 0.01164 |
| A0A067KRB3 | Histone deacetylase hdt1-like                             | 2.46  | 0.00074 | 5.15  | 0.00316 |
| B9ILZ3     | Histone h4                                                | 26.72 | 0.00001 | 2.07  | 0.00521 |
| Q4ZH67     | Hmg1 2-like protein                                       | 8.41  | 0.00010 | 9.16  | 0.00006 |
| A0A067KV00 | Hsp70 nucleotide exchange factor fes1-like                | 0.16  | 0.00053 | 0.31  | 0.01468 |
| I1J9X8     | Hsp70-hsp90 organizing protein 3                          | 0.25  | 0.04886 | 0.59  | 0.29238 |
| I1K0K7     | Hsp70-hsp90 organizing protein 3-like                     | 0.18  | 0.00009 | 0.50  | 0.00470 |

|            |                                                                     |       |         |       |         |
|------------|---------------------------------------------------------------------|-------|---------|-------|---------|
| B9RCY9     | Hyaluronan mrna binding family isoform 1                            | 0.17  | 0.00020 | 0.57  | 0.01678 |
| I1KW34     | Ice-like protease p20 domain protein                                | 7.84  | 0.00001 | -     | -       |
| B9GHS2     | Isocitrate dehydrogenase                                            | 2.03  | 0.01631 | 2.03  | 0.01631 |
| I1JJD4     | Isoform x1                                                          | 0.43  | 0.00202 | 0.61  | 0.00039 |
| A0A072UYS2 | Kda class i heat shock protein                                      | 5.34  | 0.00010 | 15.67 | 0.00119 |
| P19243     | Kda class i heat shock protein                                      | 16.89 | 0.00000 | 26.26 | 0.00005 |
| H6TB44     | Kda class ii heat shock                                             | 19.34 | 0.00772 | -     | -       |
| H6TB46     | Kda class iv heat shock protein                                     | 9.24  | 0.02695 | -     | -       |
| Q7XBA7     | Late embryogenesis abundant protein                                 | -     | -       | 4.92  | 0.00300 |
| E5GC45     | Late embryogenesis abundant protein d-29                            | -     | -       | 2.98  | 0.12796 |
| B9HV45     | Late embryogenesis abundant protein d-34-like                       | 0.01  | 0.00078 | 0.03  | 0.01265 |
| W9R0U6     | Late embryogenesis abundant protein d-34-like                       | 0.17  | 0.00117 | 0.27  | 0.00126 |
| A0A067JS88 | Late seed maturation protein                                        | 0.61  | 0.11891 | 2.27  | 0.14429 |
| Q8W1C2     | Legumin a                                                           | 19.88 | 0.00000 | 13.65 | 0.00002 |
| A0A072UBU4 | Leucine-rich repeat extensin-like protein 4                         | 0.13  | 0.00601 | 0.22  | 0.03904 |
| Q9M4E8     | Luminal-binding protein 5                                           | 0.17  | 0.00002 | 0.34  | 0.00235 |
| A0A067KKK4 | Lysm domain-containing gpi-anchored protein 1                       | 0.26  | 0.00046 | 0.41  | 0.00302 |
| I1JZ72     | Lysm domain-containing gpi-anchored protein 1-like                  | 0.27  | 0.00077 | 0.35  | 0.00152 |
| A0A075CA98 | Lysosomal alpha-mannosidase isoform x1                              | 4.21  | 0.00017 | 4.33  | 0.00378 |
| P17783     | Malate dehydrogenase mitochondrial                                  | 10.62 | 0.00000 | 7.74  | 0.00000 |
| B9R9D3     | Membrane steroid-binding protein 2-like                             | 0.11  | 0.00001 | 0.14  | 0.00962 |
| C6SXJ2     | Multiprotein-bridging factor 1a                                     | 0.37  | 0.00123 | 0.51  | 0.09015 |
| I3SYP3     | Nad -binding rossmann-fold protein                                  | 3.68  | 0.00062 | 6.08  | 0.00035 |
| A9PA21     | Nascent polypeptide-associated complex subunit alpha-like protein 1 | 2.05  | 0.03171 | 4.12  | 0.03137 |
| W9RZ99     | Nicotinamide mononucleotide adenylyltransferase                     | 5.30  | 0.00002 | 3.68  | 0.00001 |
| A0A067JF59 | Nucleoside diphosphate kinase 1                                     | 4.30  | 0.00672 | -     | -       |
| L7S218     | Nucleoside diphosphate kinase b                                     | 3.68  | 0.00266 | 6.96  | 0.00096 |
| E5GBW3     | Nucleoside diphosphate kinase chloroplastic                         | 7.03  | 0.00019 | -     | -       |
| A0A067KFU5 | Nucleosome assembly protein 1 3                                     | 0.38  | 0.00030 | -     | -       |
| B9GI54     | Oleosin kda-like                                                    | 2.32  | 0.00001 | -     | -       |
| Q84T21     | Oleosin kda-like                                                    | 2.46  | 0.00008 | 2.72  | 0.01578 |
| K4KD17     | Atpb                                                                | 25.43 | 0.00028 | 3.78  | 0.00271 |
| Q52UN0     | Peptidyl-prolyl cis-trans isomerase                                 | 5.67  | 0.00000 | 9.47  | 0.00000 |
| Q84TK9     | Peptidyl-prolyl cis-trans isomerase family protein                  | 9.96  | 0.00097 | -     | -       |
| Q39650     | Peroxidase 2-like                                                   | 3.08  | 0.01516 | -     | -       |
| Q6UBM4     | Peroxidase 2-like                                                   | 2.94  | 0.00001 | 0.47  | 0.01591 |
| A9P8D8     | Peroxiredoxin- chloroplastic                                        | 5.04  | 0.00006 | -     | -       |
| A0A067KWB6 | Peroxiredoxin family protein                                        | 1.62  | 0.07771 | 3.40  | 0.01039 |
| B0F824     | Peroxygenase                                                        | 5.48  | 0.00047 | 39.23 | 0.00023 |
| I1MJC7     | Phosphoglycerate cytosolic                                          | 4.04  | 0.00160 | 10.82 | 0.00067 |
| A1BQH1     | Phospho-glycerate partial                                           | 11.23 | 0.00001 | 18.09 | 0.00003 |
| A0A067KYM7 | Plasmodesmata callose-binding protein 3                             | 0.39  | 0.00122 | -     | -       |
| B9HYK9     | Plus-3 domain-containing family protein                             | 2.41  | 0.00114 | -     | -       |
| Q9M549     | Polyadenylate-binding protein 2                                     | 0.44  | 0.01491 | -     | -       |

|            |                                                                          |       |         |       |         |
|------------|--------------------------------------------------------------------------|-------|---------|-------|---------|
| A0A072UMK2 | Polyubiquitin-a isoform x2                                               | 0.15  | 0.00000 | 1.83  | 0.14659 |
| M5WVT8     | Probable calcium-binding protein cml27                                   | 0.21  | 0.00390 | 0.34  | 0.00315 |
| B3U2B1     | Probable e3 ubiquitin-protein ligase log2                                | 3.10  | 0.00306 | 0.41  | 0.01479 |
| B9RIR5     | Probable nadh dehydrogenase                                              | -     | -       | 2.81  | 0.03037 |
| W9QKF5     | Probable nadh dehydrogenase                                              | 0.46  | 0.18220 | -     | -       |
| B6DQ61     | Probable phospholipid hydroperoxide glutathione peroxidase               | 2.50  | 0.01323 | -     | -       |
| B9RCA6     | Probable phospholipid hydroperoxide glutathione peroxidase mitochondrial | 0.80  | 0.00425 | 2.40  | 0.00035 |
| V7CV47     | Probable protein phosphatase 2c 55                                       | 11.25 | 0.00037 | -     | -       |
| V7CD80     | Probable serine protease eda2                                            | 0.64  | 0.07535 | -     | -       |
| C6SVG8     | Protease inhibitor seed storage ltp family protein                       | 0.42  | 0.01119 | -     | -       |
| W9R4F2     | Proteasome subunit alpha type-2-a                                        | 7.96  | 0.02927 | 1.79  | 0.29097 |
| B9IH97     | Proteasome subunit alpha type-4                                          | 0.39  | 0.06878 | -     | -       |
| A0A067KBK8 | Proteasome subunit alpha type-7                                          | 1.69  | 0.00459 | 3.14  | 0.01495 |
| I1JW44     | Protein aspartic protease in guard cell 2-like                           | 2.56  | 0.00042 | 2.01  | 0.00596 |
| I1KP58     | Protein dek                                                              | 2.34  | 0.00984 | -     | -       |
| Q9FRW1     | Protein disulfide-isomerase                                              | -     | -       | 2.66  | 0.00200 |
| A0A067K1B2 | Protein efr3 homolog b-like isoform x2                                   | 2.52  | 0.00131 | -     | -       |
| Q2PPJ2     | Protein mother of ft and tf 1                                            | 3.94  | 0.00015 | -     | -       |
| B9S2N7     | Protein phosphatase                                                      | 24.61 | 0.00001 | -     | -       |
| B9T0Z8     | Protein tic chloroplastic                                                | 0.14  | 0.00291 | 0.35  | 0.05516 |
| B5AJV3     | Ran-binding protein 1 homolog a-like                                     | 0.18  | 0.00281 | 0.43  | 0.13050 |
| W9SHD4     | Remorin family protein                                                   | 0.22  | 0.02338 | -     | -       |
| M5WTG1     | Ribulose-phosphate 3- cytoplasmic isoform                                | 5.86  | 0.07207 | 1.89  | 0.34807 |
| E5GBB4     | Seed maturation protein                                                  | -     | -       | 3.83  | 0.02417 |
| M5WJC3     | Seed maturation protein pm41                                             | 0.03  | 0.00987 | 0.03  | 0.00342 |
| B9SJ52     | Serine carboxypeptidase s10 family protein                               | 31.01 | 0.00036 | -     | -       |
| I3SYA1     | Serine carboxypeptidase-like 50                                          | 5.92  | 0.00025 | -     | -       |
| W9QIF4     | Short-chain type dehydrogenase reductase-like                            | -     | -       | 2.11  | 0.00544 |
| B9RMP5     | Small heat shock chloroplastic-like                                      | 2.23  | 0.00154 | -     | -       |
| H6TB40     | Small heat shock chloroplastic-like isoform x2                           | 5.76  | 0.02131 | 2.84  | 0.07108 |
| A0A072UBI6 | Small hydrophilic plant seed protein                                     | -     | -       | 2.13  | 0.01648 |
| M5WJN3     | Small ubiquitin-related modifier 1                                       | 0.17  | 0.01948 | 0.26  | 0.23354 |
| O23759     | Small ubiquitin-related modifier 1-like                                  | 0.32  | 0.00035 | -     | -       |
| Q58A16     | Stress responsive a b barrel domain                                      | 7.19  | 0.00005 | -     | -       |
| B9TB09     | Sulfate abc periplasmic sulfate-binding protein                          | -     | -       | 4.12  | 0.00002 |
| A0A072U725 | Sulfite oxidase                                                          | 8.09  | 0.00004 | -     | -       |
| Q6QGY4     | Superoxide dismutase                                                     | 13.20 | 0.00012 | -     | -       |
| A0A067KBA6 | Syntaxin 73 family protein                                               | 0.09  | 0.00023 | 0.49  | 0.27029 |
| K7M8K8     | Thaumatococcus-like protein 1b                                           | 0.26  | 0.00821 | -     | -       |
| A9PCJ7     | Transcription factor btf3 homolog 4-like                                 | 25.42 | 0.00000 | 2.15  | 0.00007 |
| Q9M5I8     | Translationally-controlled tumor protein homolog                         | 2.91  | 0.00000 | 2.57  | 0.00064 |
| A0A072U2W1 | Triosephosphate isomerase chloroplastic                                  | 6.60  | 0.00174 | -     | -       |
| A0A067LKT3 | Triosephosphate isomerase cytosolic                                      | 7.05  | 0.00842 | 14.10 | 0.15009 |
| B9GJN0     | Triosephosphate isomerase cytosolic                                      | 8.23  | 0.00026 | 11.29 | 0.00307 |

|            |                                                     |       |         |       |         |
|------------|-----------------------------------------------------|-------|---------|-------|---------|
| Q38IW8     | Triosephosphate isomerase cytosolic                 | 10.64 | 0.00037 | 11.03 | 0.00048 |
| V7BC29     | Tripeptidyl-peptidase 2-like isoform x1             | 0.22  | 0.00012 | -     | -       |
| B9S382     | Tubulin $\beta$ -2 chain                            | -     | -       | 19.71 | 0.00012 |
| E5GB46     | U2 small nuclear ribonucleoprotein a                | 10.22 | 0.00536 | -     | -       |
| A0A067L974 | Ubiquitin domain-containing protein dsk2a-like      | 0.13  | 0.00006 | 0.42  | 0.11805 |
| B9H660     | Ubiquitin domain-containing protein dsk2a-like      | 0.34  | 0.00007 | 0.38  | 0.00339 |
| A6YTC7     | Uncharacterized gpi-anchored protein at3g06035      | 0.53  | 0.10199 | 0.12  | 0.10064 |
| A0A067JHV0 | Uncharacterized gpi-anchored protein at5g19250-like | 0.44  | 0.00329 | -     | -       |
| Q19TV8     | Utp--glucose-1-phosphate uridylyltransferase        | 0.29  | 0.00084 | 2.90  | 0.07416 |
| Q9ZWI3     | Vicilin gc72-a                                      | 3.49  | 0.00000 | 7.69  | 0.00000 |
| Q39651     | Vicilin-like antimicrobial peptides 2-2             | 6.54  | 0.00005 | 21.46 | 0.00001 |
| F2YML9     | Vicilin-like protein                                | -     | -       | 8.47  | 0.00038 |
| K7LJF5     | Wat1-related protein at1g09380-like                 | 45.88 | 0.00000 | -     | -       |

Red background indicates increased proteins, and green background indicates significant decreased protein (fold change  $\geq 2$  or  $\leq -2$  and P value  $< 0.05$ ). “-“ indicates not detected.

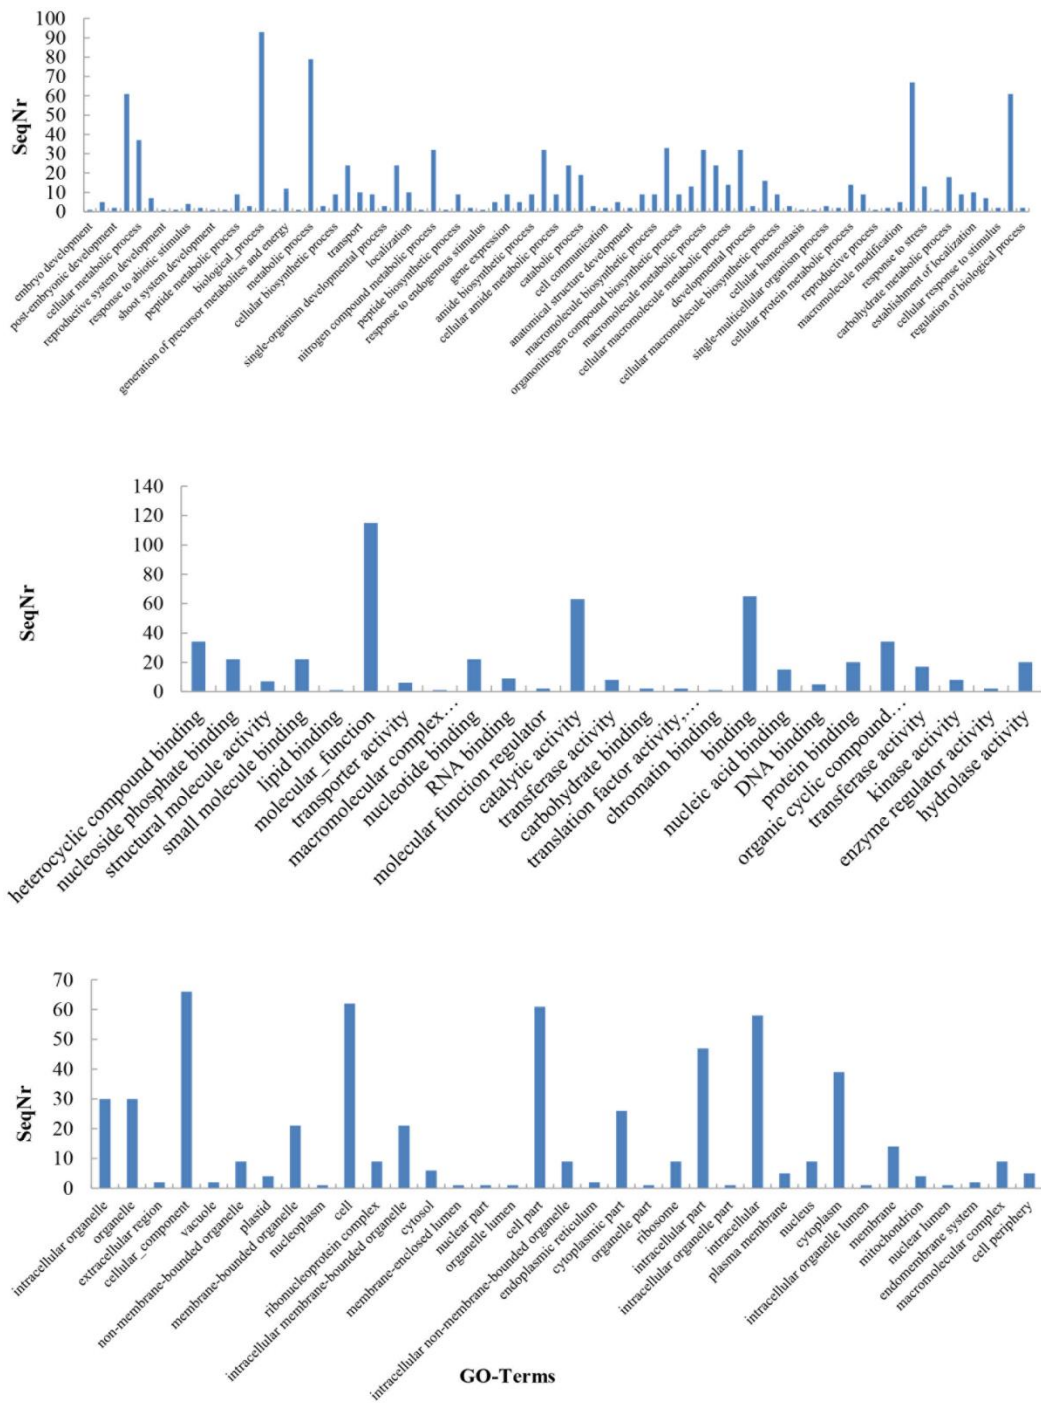

Fig. S1 Sequence distribution of differentially expressed proteins involved in biological processes (A), molecule functions (B), and cellular components (C) after melatonin treatment under salt stress.







# Oxidative phosphorylation

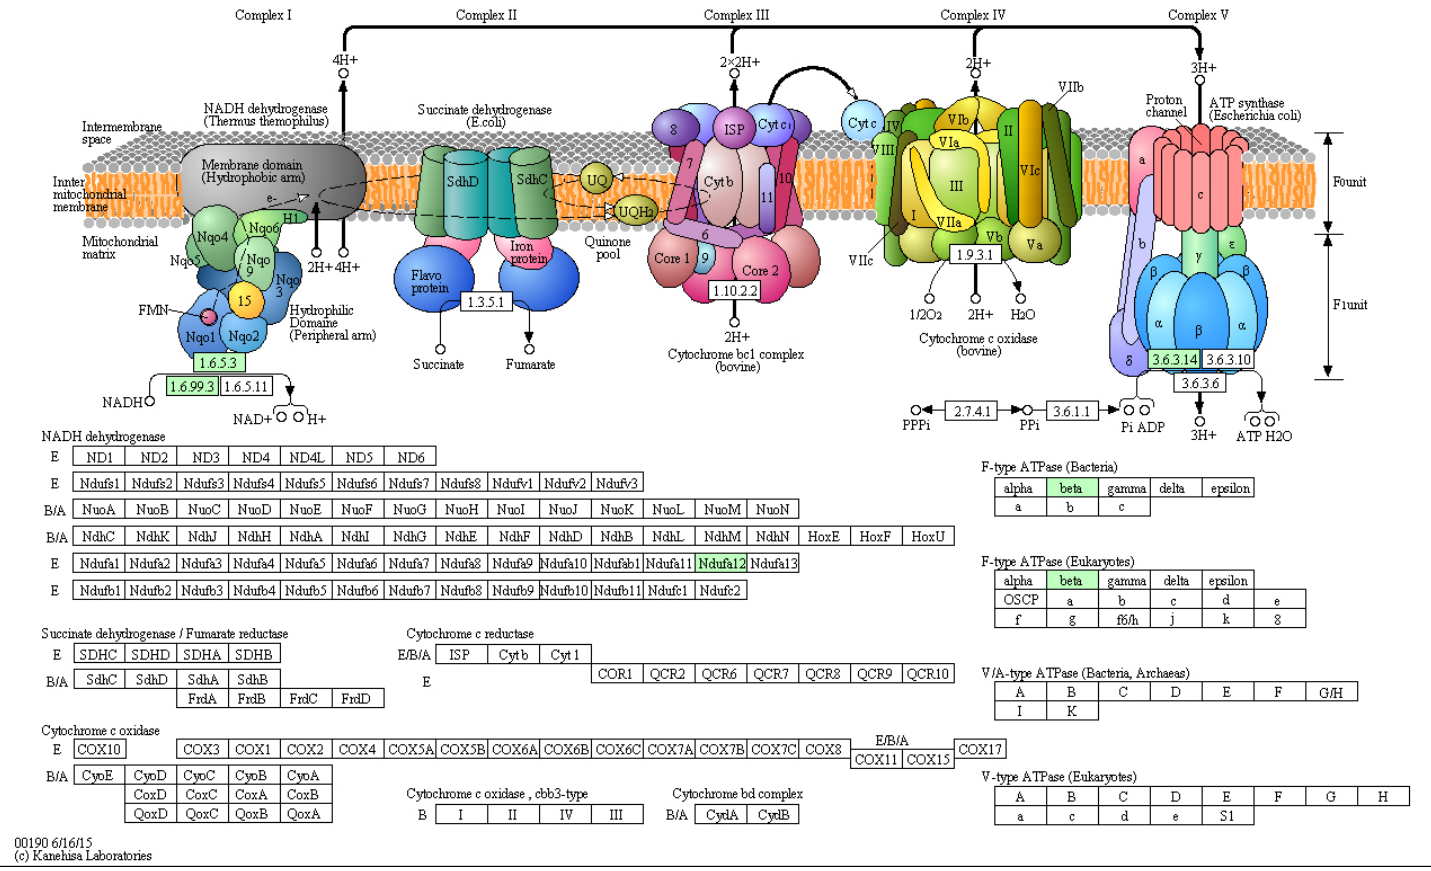

Fig.S4 Oxidative phosphorylation pathway obtained from KEGG pathway analysis. The protein names in green color are differentially regulated by melatonin under salt stress during seed germination in cucumber.
